# Supplementary material for: Analysis of explicit model predictive control for path-following control
Source: PLoS One. 2018 Mar 13;13(3):e0194110. doi: 10.1371/journal.pone.0194110 (PMC5849315; doi:10.1371/journal.pone.0194110)
Supplement: S1 Dataset — (XLSX) [file pone.0194110.s001.xlsx]

## Sheet: Sheet1
CR.A1								CR.b1	CR.A2								CR.b2	CR.A3								CR.b3	CR.A4								CR.b4	CR.A5								CR.b5	CR.A6
-0.792157	-0.0189692	-0.609995	0.00356041	0.00132963	0.000621504	-0.000885278	0.00408042	0.134958	3.98978e-15	-0.00367007	0.999952	0.00911977	-0.000145732	-5.29916e-17	-2.18735e-17	-2.56619e-18	0.463275	-4.07564e-15	0.00367007	-0.999952	-0.00911977	0.000145732	5.2798e-17	2.19152e-17	2.55514e-18	-0.463275	0	0.326269	0.869155	-0.371421	0.012862	-1.5276e-17	1.30937e-17	-1.74583e-17	-0.885014	-0.803542	-0.0183905	-0.594862	0.00895329	0.000275614	0.000551434	-0.00252901	0.00589066	0.0922262	0.115685	0.0144407	-0.993036	-0.0169649	-0.000141161
-0.288151	-0.0112286	0.957442	0.0120509	0.000311786	0.000226075	-0.000322023	0.00148427	0.595473	-4.46932e-15	-0.326269	-0.869155	0.371421	-0.012862	-1.09114e-17	-4.36457e-18	0	0.885014	-0.483731	-0.0109099	-0.8751	-0.00879962	0.00221916	0.000478045	0.00149347	0.000307256	-0.0809252	-0.772308	-0.0174159	-0.63491	-0.0103213	0.00354234	0.00076323	0.00238442	0.000490554	0.213	-0.778347	-0.0365134	-0.626024	0.0299598	-0.000470189	0.000534144	-0.00244972	0.00570596	0.140057	0.084583	0.00423645	0.996402	0.00330528	-0.000354239
-0.776556	-0.0302705	-0.629083	0.0167809	0.000843203	0.000609263	-0.000867842	0.00400006	0.163969	-0.768672	-0.0200938	-0.639273	-0.00713097	0.00341686	0.000759637	0.00237319	0.000488245	0.219484	-0.111794	-0.00536137	-0.993713	-0.00263719	0.000401723	-1.72039e-05	0.000345151	7.10091e-05	-0.442838	-0.142478	-0.0068259	0.989744	0.0076732	0.000509909	-2.19258e-05	0.000439885	9.04989e-05	0.448516	0.800177	-0.170384	-0.537914	0.202823	-0.00771253	-0.00983735	0.00251842	-0.005866	0.765113	0.113118	0.00565842	-0.993541	-0.00695565	-0.000471605
-0.773182	-0.0198846	-0.63384	-0.00512014	0.00302454	0.000733736	0.00176037	0.0011642	0.203605	-0.145597	-0.0153626	0.989072	0.0173892	0.000190435	-2.24059e-05	0.000449516	9.24804e-05	0.481087	-0.450296	-0.0164601	0.892694	0.00742345	0.00181545	0.00162139	0.000203248	0.000286018	0.715279	-0.718591	-0.0344599	-0.694484	0.0109085	0.00257636	-0.000105354	0.00221857	0.000456434	0.278003	0.804734	0.0183097	0.593249	-0.00885425	-0.000280285	0.00307248	-0.00112463	-0.0058994	-0.0946924	-0.451565	-0.00673039	-0.892093	-0.0142699	0.0025129
-0.78206	-0.0319302	0.621981	0.0221193	0.00125271	0.000461681	-0.000193373	0.00329747	0.640491	-0.717376	-0.0352923	-0.695682	0.011904	0.00253689	-0.000105176	0.00221482	0.000455662	0.279949	-0.562109	-0.0269679	-0.826589	0.00716024	0.00201514	0.000845372	0.000811422	0.00035704	-0.141789	-0.757507	-0.0276966	-0.652223	0.00195391	0.00305601	0.00272758	0.000341912	0.000481153	0.236278	-0.137231	-0.0210034	0.989934	0.0274387	-0.000658288	0.000389689	-0.00137393	0.00100603	0.382888	-0.982107	-0.0368605	0.184518	0.00495107	0.00458696
-0.72289	-0.0341712	-0.690017	0.0113283	0.00245394	-5.46355e-05	0.00199997	0.000708185	0.269977	-0.767992	-0.0201359	-0.640088	-0.00706248	0.00341148	0.00276533	0.000346645	0.000487813	0.218	4.07564e-15	-0.00367007	0.999952	0.00911977	-0.000145732	-5.2798e-17	-2.19152e-17	-2.55514e-18	0.546524	-0.672893	-0.0322775	0.738834	0.017024	0.00241071	0.00101198	0.000971341	0.000427408	0.606184	0.169892	0.00796641	-0.985356	-0.0120267	0.000103662	-0.000116589	0.000534707	-0.00124546	0.587788	-0.961198	-0.0481705	-0.271072	0.0165614	0.00401295
-0.716084	-0.0223639	-0.696971	-0.0282059	0.00754526	0.00702581	0.00280091	-0.00667676	0.382492	-0.681021	-0.0390307	0.730808	0.0244735	0.00218898	0.00102421	0.000983075	0.000432571	0.630767	0.483731	0.0109099	0.8751	0.00879962	-0.00221916	-0.000478045	-0.00149347	-0.000307256	0.396533	-0.719038	-0.0345262	-0.694017	0.0109714	0.00257619	0.00232244	-0.000192842	0.000456718	0.278604	0.35276	0.0205271	-0.935173	-0.0241249	0.000371222	-6.28851e-05	0.00111025	-0.00258604	0.727579	-0.115685	-0.0144407	0.993036	0.0169649	0.000141161
-0.937819	-0.0417549	0.343857	0.0224001	0.00246237	0.00115184	0.000433185	0.00221891	0.596927	-3.98978e-15	0.00367007	-0.999952	-0.00911977	0.000145732	5.29916e-17	2.18735e-17	2.56619e-18	0.546524	0.450296	0.0164601	-0.892694	-0.00742345	-0.00181545	-0.00162139	-0.000203248	-0.000286018	-0.565205	0.757507	0.0276966	0.652223	-0.00195391	-0.00305601	-0.00272758	-0.000341912	-0.000481153	0.0161836	0.137231	0.0210034	-0.989934	-0.0274387	0.000658288	-0.000389689	0.00137393	-0.00100603	0.799992	0.451565	0.00673039	0.892093	0.0142699	-0.0025129
-0.51867	-0.0454706	-0.853616	-0.00653925	0.00754091	0.00724033	0.00179384	-0.00994757	0.602231	0.145597	0.0153626	-0.989072	-0.0173892	-0.000190435	2.24059e-05	-0.000449516	-9.24804e-05	0.671176	0.384449	0.0184562	-0.922879	-0.0121943	-0.00137623	-0.00124174	0.000103107	-0.000244194	-0.564163	0.776556	0.0302705	0.629083	-0.0167809	-0.000843203	-0.000609263	0.000867842	-0.00400006	-0.163969	0.773182	0.0198846	0.63384	0.00512014	-0.00302454	-0.000733736	-0.00176037	-0.0011642	-0.203605	0.982107	0.0368605	-0.184518	-0.00495107	-0.00458696
0.792157	0.0189692	0.609995	-0.00356041	-0.00132963	-0.000621504	0.000885278	-0.00408042	0.134958	0.681021	0.0390307	-0.730808	-0.0244735	-0.00218898	-0.00102421	-0.000983075	-0.000432571	0.774983	0.288151	0.0112286	-0.957442	-0.0120509	-0.000311786	-0.000226075	0.000322023	-0.00148427	-0.595473	0	-1	0	0	0	0	0	0	10	0	-1	0	0	0	0	0	0	10	0.953853	0.0478251	-0.295773	-0.0192251	-0.0039808
0.288151	0.0112286	-0.957442	-0.0120509	-0.000311786	-0.000226075	0.000322023	-0.00148427	0.595473	0.792157	0.0189692	0.609995	-0.00356041	-0.00132963	-0.000621504	0.000885278	-0.00408042	-0.134958	0	-1	0	0	0	0	0	0	10	0	0	-1	0	0	0	0	0	0.5	0	0	-1	0	0	0	0	0	0.5	0.78206	0.0319302	-0.621981	-0.0221193	-0.00125271
0.776556	0.0302705	0.629083	-0.0167809	-0.000843203	-0.000609263	0.000867842	-0.00400006	0.163969	0	-1	0	0	0	0	0	0	10	0	0	0	0	-1	0	0	0	2	0	0	0	0	-1	0	0	0	2	0	0	0	-1	0	0	0	0	10	-1	0	0	0	0
0.773182	0.0198846	0.63384	0.00512014	-0.00302454	-0.000733736	-0.00176037	-0.0011642	0.203605	0	0	-1	0	0	0	0	0	0.5	0	0	0	0	0	-1	0	0	2	0	0	0	0	0	-1	0	0	2	0	0	0	0	-1	0	0	0	2	0	-1	0	0	0
0.78206	0.0319302	-0.621981	-0.0221193	-0.00125271	-0.000461681	0.000193373	-0.00329747	0.640491	0	0	0	-1	0	0	0	0	10	0	0	0	0	0	0	-1	0	2	0	0	0	0	0	0	-1	0	2	0	0	0	0	0	-1	0	0	2	0	0	0	0	-1
0.72289	0.0341712	0.690017	-0.0113283	-0.00245394	5.46355e-05	-0.00199997	-0.000708185	0.269977	0	0	0	0	-1	0	0	0	2	0	0	0	0	0	0	0	-1	1	0	0	0	0	0	0	0	-1	1	0	0	0	0	0	0	0	-1	1	0	0	0	0	0
0.716084	0.0223639	0.696971	0.0282059	-0.00754526	-0.00702581	-0.00280091	0.00667676	0.382492	0	0	0	0	0	-1	0	0	2	0	1	0	0	0	0	0	0	10	0	1	0	0	0	0	0	0	10	0	1	0	0	0	0	0	0	10	0	0	0	0	0
0.937819	0.0417549	-0.343857	-0.0224001	-0.00246237	-0.00115184	-0.000433185	-0.00221891	0.596927	0	0	0	0	0	0	-1	0	2	0	0	1	0	0	0	0	0	0.5	0	0	0	1	0	0	0	0	10	0	0	1	0	0	0	0	0	0.5	0	0	0	0	0
0.51867	0.0454706	0.853616	0.00653925	-0.00754091	-0.00724033	-0.00179384	0.00994757	0.602231	0	0	0	0	0	0	0	-1	1	0	0	0	1	0	0	0	0	10	0	0	0	0	1	0	0	0	2	0	0	0	0	1	0	0	0	2	0	1	0	0	0
0	-1	0	0	0	0	0	0	10	0	1	0	0	0	0	0	0	10	0	0	0	0	1	0	0	0	2	0	0	0	0	0	1	0	0	2	0	0	0	0	0	1	0	0	2	0	0	1	0	0
0	0	-1	0	0	0	0	0	0.5	0	0	1	0	0	0	0	0	0.5	0	0	0	0	0	1	0	0	2	0	0	0	0	0	0	1	0	2	0	0	0	0	0	0	1	0	2	0	0	0	1	0
0	0	0	-1	0	0	0	0	10	0	0	0	1	0	0	0	0	10	0	0	0	0	0	0	1	0	2	0	0	0	0	0	0	0	1	1	0	0	0	0	0	0	0	1	1	0	0	0	0	1
0	0	0	0	-1	0	0	0	2	0	0	0	0	1	0	0	0	2	0	0	0	0	0	0	0	1	1																			0	0	0	0	0
0	0	0	0	0	-1	0	0	2	0	0	0	0	0	1	0	0	2																												0	0	0	0	0
0	0	0	0	0	0	-1	0	2	0	0	0	0	0	0	1	0	2																												0	0	0	0	0
0	0	0	0	0	0	0	-1	1	0	0	0	0	0	0	0	1	1
0	1	0	0	0	0	0	0	10
0	0	1	0	0	0	0	0	0.5
0	0	0	1	0	0	0	0	10
0	0	0	0	1	0	0	0	2
0	0	0	0	0	1	0	0	2
0	0	0	0	0	0	1	0	2
0	0	0	0	0	0	0	1	1
[truncated: 859 more columns]
